# Supplementary material for: Impact of Prepectoral vs. Subpectoral Tissue Expander Placement on Post-mastectomy Radiation Therapy Delivery: A Retrospective Cohort Study
Source: PubMed Central journal article supplement — Plast Reconstr Surg Glob Open. 2023 Dec 19;11(12):e5434. doi: 10.1097/GOX.0000000000005434 (PMC10730031; doi:10.1097/gox.0000000000005434), 2023-12-19
Supplement: gox-11-e5434-s001.pdf [file gox-11-e5434-s001.pdf]

**SDC 1. Multivariable regression analysis for pectoralis cold spot, which is defined as percentage of pectoralis major muscle volume receiving less than 95% of intended radiation dose.**

| Characteristic                                                                                             | Estimate      | 95% CI <sup>1</sup> | p-value      |
|------------------------------------------------------------------------------------------------------------|---------------|---------------------|--------------|
| <b>Cohort</b>                                                                                              |               |                     |              |
| Prepectoral group                                                                                          | - reference - | - reference -       |              |
| Subpectoral group                                                                                          | 5.5           | 0.67, 10            | <b>0.027</b> |
| <b>BMI</b>                                                                                                 | -0.07         | -0.68, 0.55         | 0.83         |
| <b>Pathologic Stage (AJCC)</b>                                                                             |               |                     |              |
| 0                                                                                                          | - reference - | - reference -       |              |
| I                                                                                                          | 0.94          | -9.5, 11            | 0.86         |
| II                                                                                                         | 1.9           | -7.2, 11            | 0.68         |
| III                                                                                                        | 8.6           | -1.3, 19            | 0.088        |
| <b>Ipsilateral tissue expander fill</b>                                                                    | -0.02         | -0.04, 0.00         | 0.10         |
| <b>Radiation laterality</b>                                                                                |               |                     |              |
| Left                                                                                                       | - reference - | - reference -       |              |
| Right                                                                                                      | -1.7          | -6.6, 3.2           | 0.49         |
| <b>Chest wall dose (in Gray)</b>                                                                           | 1.5           | 0.43, 2.6           | <b>0.008</b> |
| BMI = Body Mass Index. AJCC = American Joint Committee on Cancer.<br><sup>1</sup> CI = Confidence Interval |               |                     |              |

**SDC 2. Multivariable regression analysis for pectoralis cold spot for 98%, which is defined as percentage of pectoralis major muscle volume receiving less than 98% of intended radiation dose.**

| Characteristic                          | Estimate      | 95% CI <sup>1</sup> | p-value |
|-----------------------------------------|---------------|---------------------|---------|
| <b>Cohort</b>                           |               |                     |         |
| Prepectoral group                       | - reference - | - reference -       |         |
| Subpectoral group                       | 14            | 7.0, 21             | <0.001  |
| <b>BMI</b>                              | -0.33         | -1.2, 0.53          | 0.44    |
| <b>Pathologic Stage (AJCC)</b>          |               |                     |         |
| 0                                       | - reference - | - reference -       |         |
| I                                       | 0.24          | -14, 15             | 0.97    |
| II                                      | -4.0          | -17, 8.6            | 0.52    |
| III                                     | -10           | -24, 3.8            | 0.15    |
| <b>Ipsilateral tissue expander fill</b> | 0.02          | -0.01, 0.05         | 0.19    |
| <b>Radiation laterality</b>             |               |                     |         |
| Left                                    | - reference - | - reference -       |         |
| Right                                   | 4.9           | -2.0, 12            | 0.16    |
| <b>Chest wall dose (in Gray)</b>        | -3.4          | -4.9, -1.9          | <0.001  |

BMI = Body Mass Index. AJCC = American Joint Committee on Cancer.  
<sup>1</sup> CI = Confidence Interval
